# Supplementary material for: Tribocatalytic degradation of dyes by tungsten bronze ferroelectric Ba2.5Sr2.5Nb8Ta2O30submicron particles
Source: Royal Society of Chemistry journal article supplement (doi:10.1039/d0ra10807c), 2021-01-01
Supplement: d0ra10807c1.pdf [file d0ra10807c1.pdf]

## Supporting Information

### Tribocatalytic degradation of dyes by tungsten bronze ferroelectric

#### $\text{Ba}_{2.5}\text{Sr}_{2.5}\text{Nb}_8\text{Ta}_2\text{O}_{30}$ submicron particles

Chaozhong Sun,<sup>a</sup> Xiaoying Guo,<sup>a</sup> Changzheng Hu,<sup>\*a</sup> Lajun Liu,<sup>a</sup> Liang Fang,<sup>a</sup> Zhenxiang Cheng,<sup>\*b</sup> and Nengneng Luo<sup>ac</sup>

a. Guangxi Key Laboratory of Optical and Electronic Materials and Devices, Key Laboratory of New Processing Technology for Nonferrous Metals and Materials, Ministry of Education, College of Material Science and Engineering, Guilin University of Technology, Guilin 541004, China. E-mail: huchzh@foxmail.com

b. Institute for Superconducting and Electronic Materials, University of Wollongong, Innovation Campus, Squires Way, North Wollongong, NSW 2500, Australia. E-mail: cheng@uow.edu.au

c. Guangxi Key Laboratory of Processing for Non-Ferrous Metals and Featured Materials, Key Laboratory of New Processing Technology for Non-Ferrous Metals and Materials, Ministry of Education, School of Resources, Environment and Materials, Guangxi University, Nanning, 530004, China

### Experimental procedures

**Detection of active species** Using terephthalic acid (TA) as probe molecule, the friction-induced hydroxyl radical (OH) can be detected by photoluminescence (PL). The 2-hydroxyterephthalic acid produced by the combination of TA and OH has a fluorescence signal at 425 nm at an excitation wavelength of 315 nm. In the experiment, BSNT submicron powders were added to a glass beaker containing 50 mL mixed solution of 0.5 mM TA and 2 mM NaOH. Subsequently, magnetic stirring was carried out with three PTFE stirring rods at a speed of 300 rpm at dark room temperature. After centrifugation at regular intervals, 3 mL of the solution was taken and the fluorescence spectrum was recorded using an Edinburgh FS5 fluorescence spectrometer (UK).

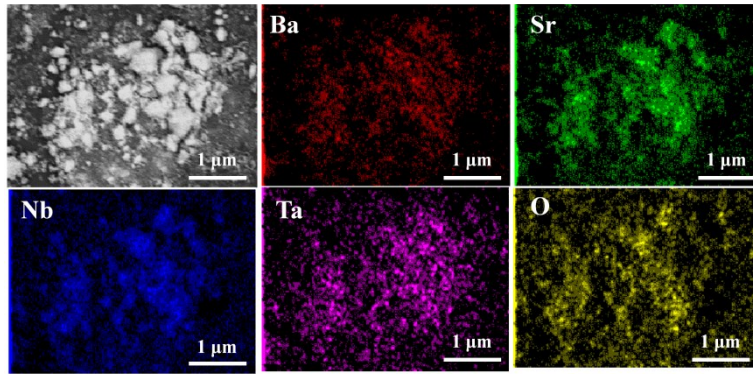

Fig. S1 EDS elemental mapping of Ba, Sr, Nb, Ta and O of the BSNT submicron particles.

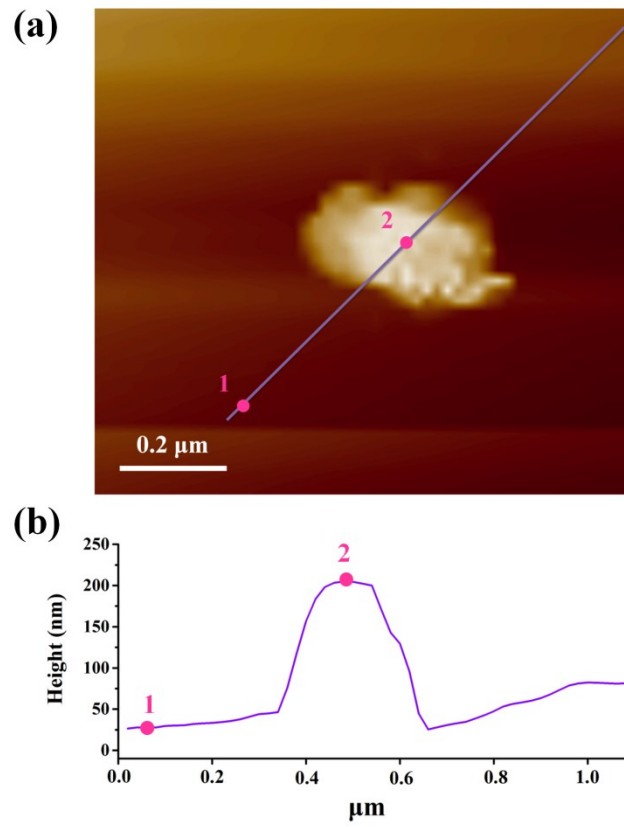

Fig. S2 (a) AFM image of the BSNT submicron particles. (b) Line profile along the purple line in the AFM image, which reveals a thickness of  $\sim 175$  nm.

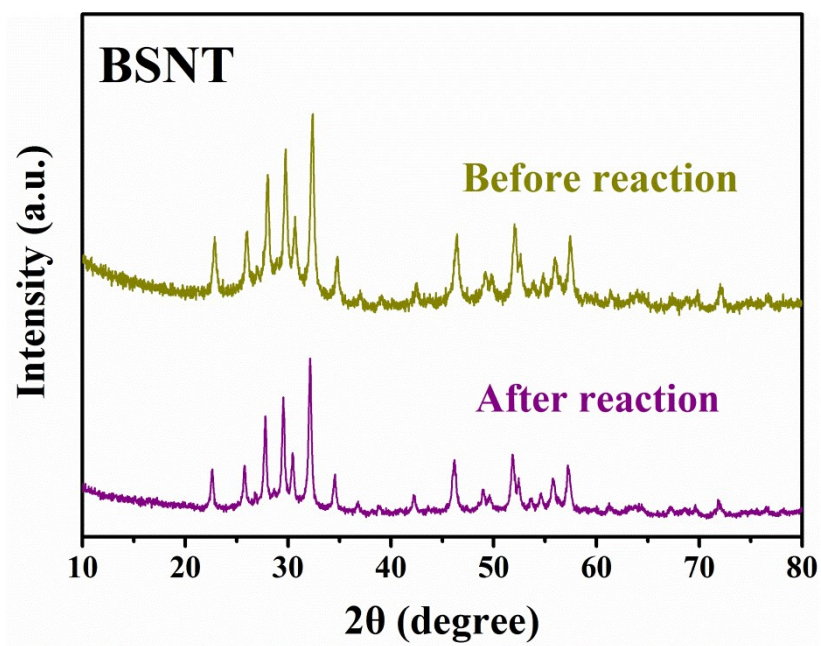

Fig. S3 XRD patterns of the BSNT tribocatalysts before and after tribocatalysis.

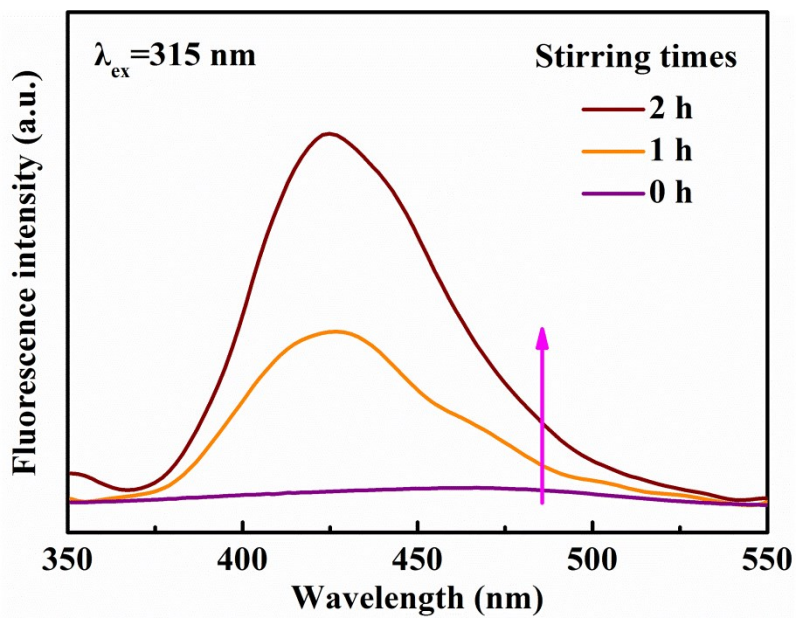

Fig. S4 The  $\bullet\text{OH}$ -trapping fluorescence spectra of suspensions containing BSNT and TA under a photoluminescent excitation wavelength of 315 nm.
